# Supplementary material
Source: Springer Nature journal article supplement (https://www.springermedizin.de/resource/supplementary/13075_2012_3622_MOESM4_ESM.pdf/9694952)

**A**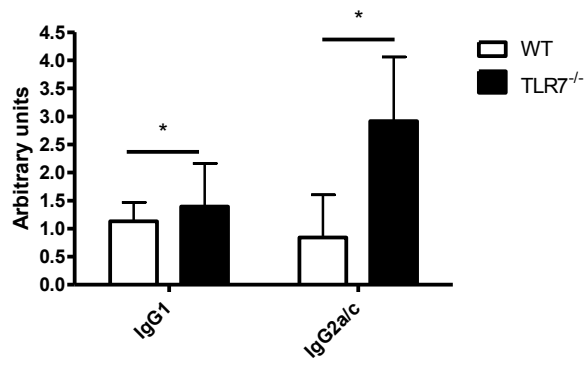**B**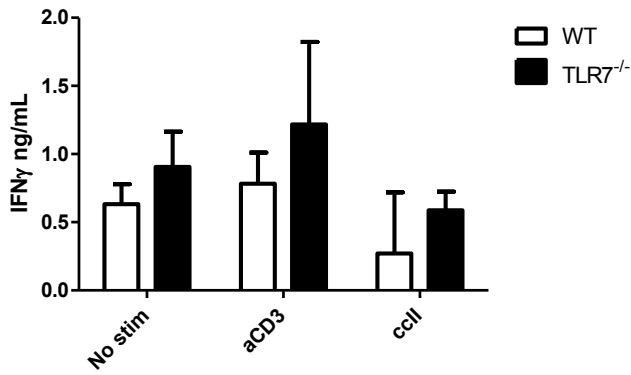**C**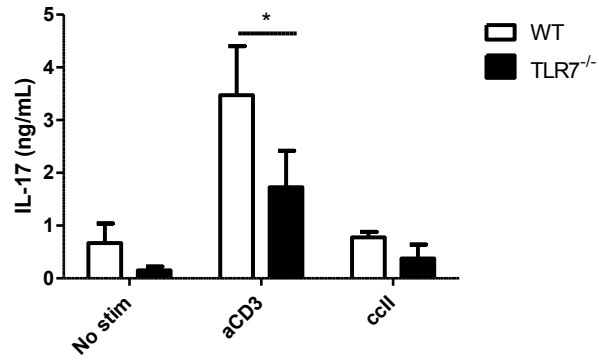**D**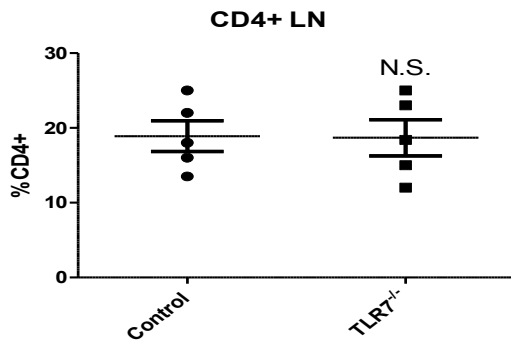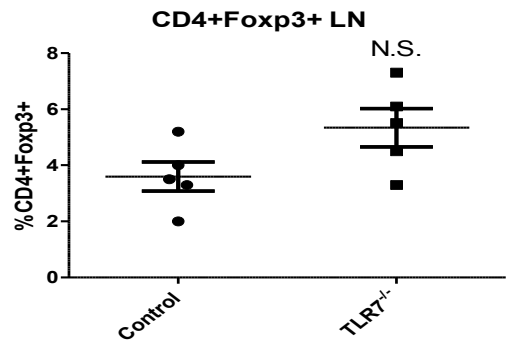**E**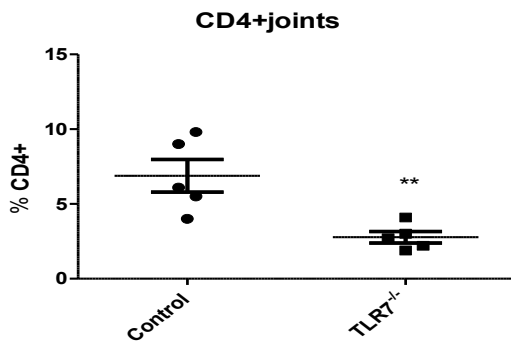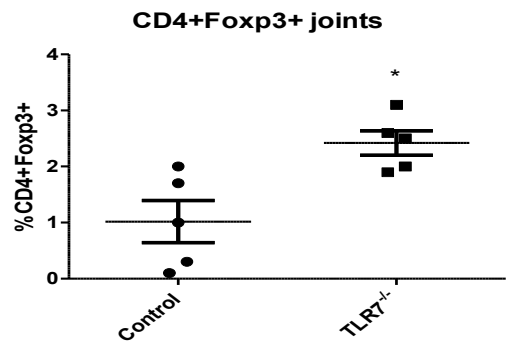

Supplement: MOESM4 [file 9694952]
